# Supplementary material for: Modulation of Heme-Induced Inflammation Using MicroRNA-Loaded Liposomes: Implications for Hemolytic Disorders Such as Malaria and Sickle Cell Disease
Source: MDPI journal article supplement (doi:10.3390/ijms242316934), 2023-11-29
Supplement: s1 [file s1]

**Supplementary Table S1.** qPCR Primers of the *IL-6R*, *TLR4*, *P65/ NFκB*, *GAPDH*, *14-3-3ζ*, *HMOX1* and *Hemopexin* genes.

|                  |         |                                  |                                     |
|------------------|---------|----------------------------------|-------------------------------------|
| <i>IL-6R</i>     | Forward | 5'-CTC CTG CCA GTT AGC AGT CC-3' | Liu et. al. (2014) [49]             |
|                  | Reverse | 5'-TCT TGC CAG GTG ACA CTG AG-3' |                                     |
| <i>TLR4</i>      | Forward | 5'-CAGGATGATGTCTGCCTCGC-3'       | Dickson-Copelan et. al. (2015) [47] |
|                  | Reverse | 5'-TTAGGAACCACCTCCACGCAG-3'      |                                     |
| <i>P65/ NFκB</i> | Forward | 5'-TGAACCGAAACTCTGGCAGCTG-3'     | Huang et. al. (2010) [50]           |
|                  | Reverse | 5'-CATCAGCTTGCGAAAAGGAGCC-3'     |                                     |
| <i>GAPDH</i>     | Forward | 5'-TCGGAGTCAACGGATTGGT-3'        | Thakar et. al. (2021) [51]          |
|                  | Reverse | 5'-TTCCCGTTCTCAGCCTTGAC-3'       |                                     |
| <i>14-3-3ζ</i>   | Forward | 5'-ACCGTTACTTGGCCGAGGTT-3'       | Brennan et. al. (2013) [52]         |
|                  | Reverse | 5'-GCAGGCTTTCTCTGGGGAGT-3'       |                                     |
| <i>HMOX1</i>     | Forward | 5'-GAGTGTAAGGACCCATCGGA-3'       | Gueron et. al. (2009) [53]          |
|                  | Reverse | 5'-GCCAGCAACAAAGTGCAAG-3'        |                                     |
| <i>Hemopexin</i> | Forward | 5'-AGGAAAAGGCAGCATCCACT-3'       | Lawson et. al. (2017) [54]          |
|                  | Reverse | 5'-GTGCCACCTATGCCTTCAGT-3'       |                                     |
